# Supplementary material for: Gas leak diffusion induced polarization in submicro/nanoscale non-tight electrolytes of solid oxide fuel cells
Source: Royal Society of Chemistry journal article supplement (doi:10.1039/c6ra10071f), 2016-01-01
Supplement: c6ra10071f1.pdf [file c6ra10071f1.pdf]

Supporting Information for

## Gas leak diffusion induced polarization in submicro/nanoscale non-tight electrolytes of solid oxide fuel cells

Yinghua Niu<sup>†</sup>, Weiqiang Lv<sup>†</sup>, Xingzhi Zhou, Weirong Huo, Luhan Ye, Weidong He\*

School of Energy Science and Engineering, University of Electronic Science and Technology, Chengdu, Sichuan  
611731, P. R. China.

\*Correspondence and requests for materials should be addressed to W. H. (email: [weidong.he@uestc.edu.cn](mailto:weidong.he@uestc.edu.cn)).

<sup>†</sup>These authors contributed equally to this work.

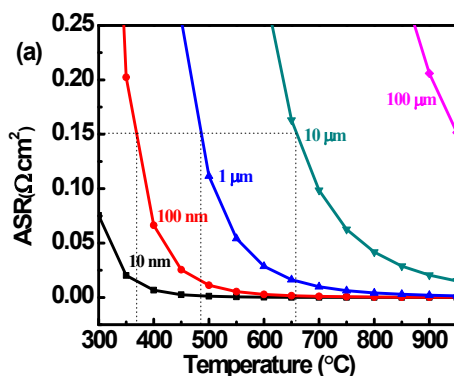

Fig. S1 Area-specific residence (ASR) of YSZ electrolyte as a function of temperature. The ionic conductivity of YSZ is adopted from Ref. [1]. The data for YSZ electrolyte with a thickness of 100  $\mu\text{m}$ , 10  $\mu\text{m}$ , 1  $\mu\text{m}$ , 100 nm and 10 nm are given. To ensure  $\text{ASR} < 0.15 \Omega \cdot \text{cm}^2$ , as indicated by the dash line, an operating temperature  $> 900 \text{ }^{\circ}\text{C}$ ,  $> 660 \text{ }^{\circ}\text{C}$ ,  $> 490 \text{ }^{\circ}\text{C}$  and  $> 370 \text{ }^{\circ}\text{C}$  is required for YSZ of 100  $\mu\text{m}$ , 10  $\mu\text{m}$ , 1  $\mu\text{m}$  and 100 nm thicknesses, respectively.

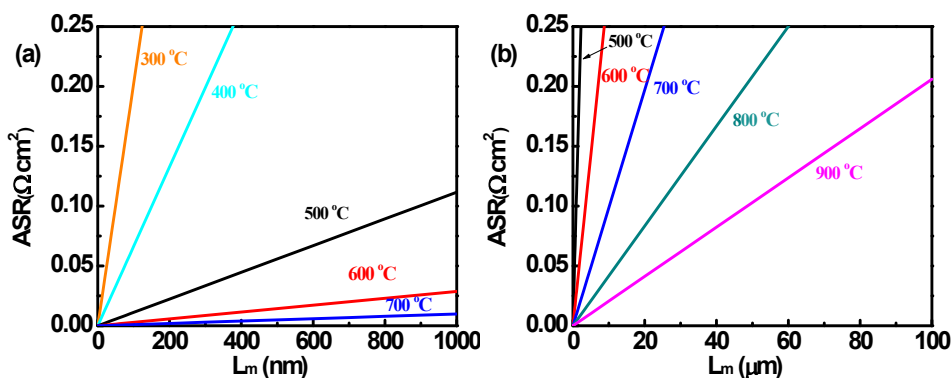

Fig. S2 ASR as a function of YSZ thickness in the range of (a) 0~1000 nm and (b) 0~100  $\mu\text{m}$ , at different

temperatures. To ensure  $ASR < 0.15 \Omega \cdot \text{cm}^2$  and  $\mu\text{SOFCs}$  operate below  $400 \text{ }^\circ\text{C}$ , the thickness of YSZ should be decreased to  $< 200 \text{ nm}$ .

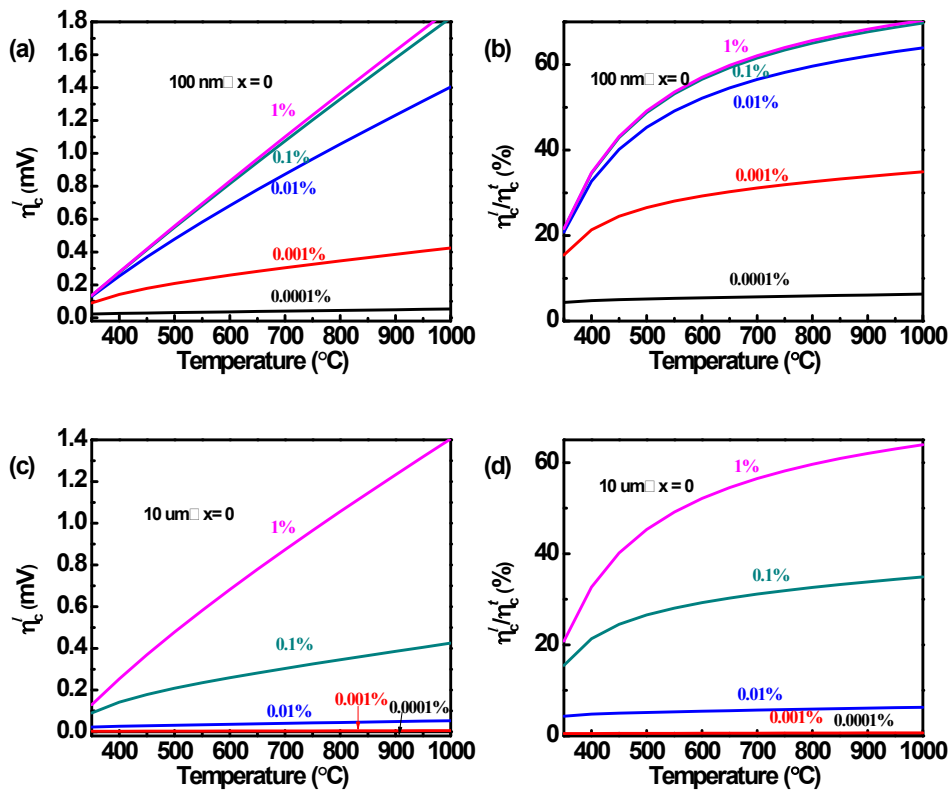

**Fig. S3** Electrolyte leak gas diffusion induced cathode concentration polarization as a function of temperature when the electrolyte thickness is (a-b) 100 nm and (c-d) 10  $\mu\text{m}$ , respectively. (a) and (c) show  $\eta_c^l$  versus  $T$ . (b) and (d) show the proportion of  $\eta_c^l$  to the total cathode polarization versus  $T$ . In the calculations, SOFCs operate at an output current density of  $0.1 \text{ A/cm}^2$ . It is assumed that the leaked  $\text{H}_2$  and  $\text{O}_2$  do not react directly ( $x = 0$ ).

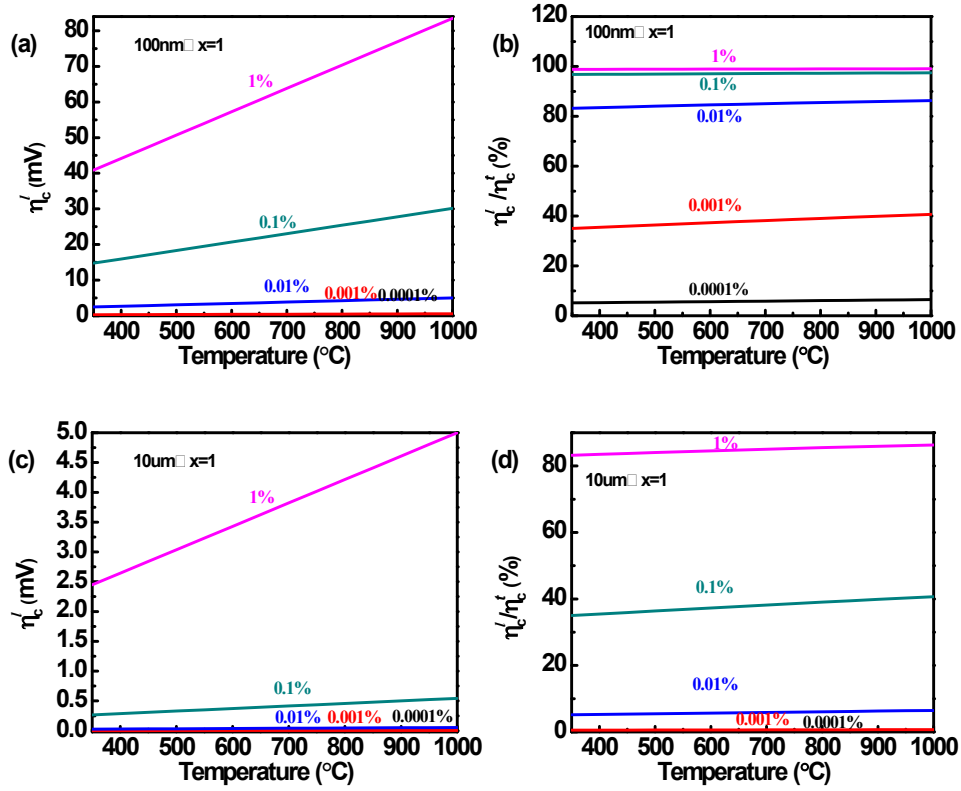

Fig. S4 Electrolyte leak gas diffusion induced cathode concentration polarization as a function of temperature when the electrolyte thickness is (a-b) 100 nm and (c-d) 10  $\mu\text{m}$ , respectively. (a) and (c) show the  $\eta_c^l$  versus  $T$ . (b) and (d) show the proportion of  $\eta_c^l$  to the total cathode polarization versus  $T$ . In the calculations, SOFCs operate at an output current density of 0.1 A/cm<sup>2</sup>. It is assumed that the leaked H<sub>2</sub> and O<sub>2</sub> react completely ( $x = 1$ ).

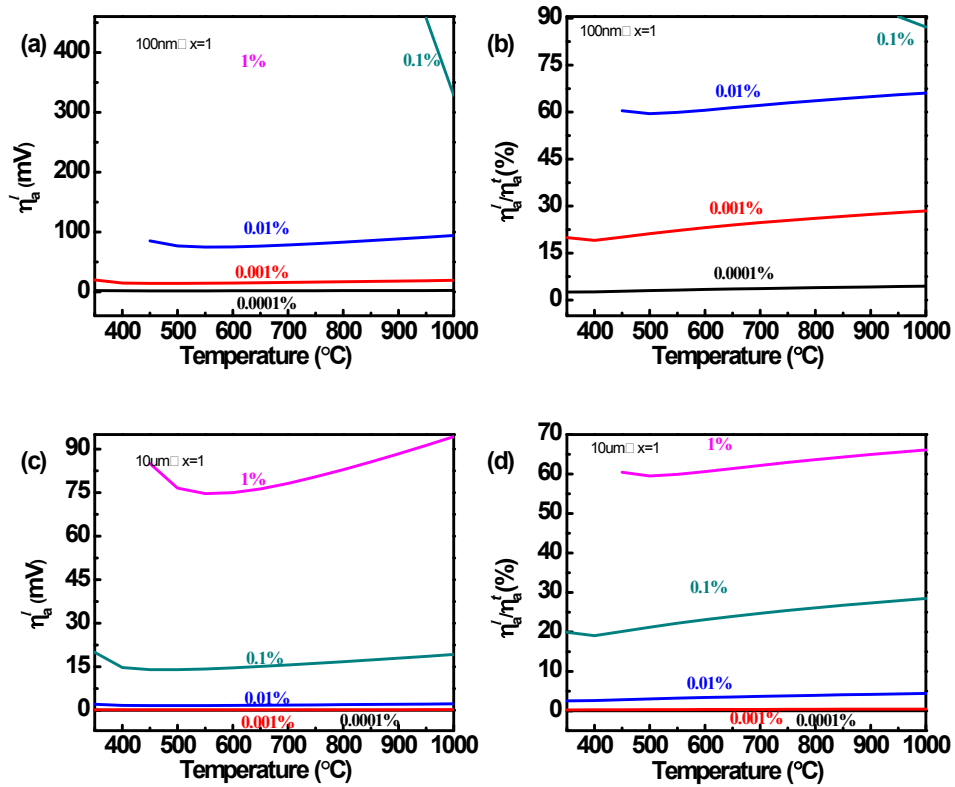

Fig. S5 Electrolyte leak gas diffusion induced anode concentration polarization as a function of temperature when the electrolyte thickness is (a-b) 100 nm and (c-d) 10  $\mu\text{m}$ , respectively. (a) and (c) show the  $\eta_a^l$  versus  $T$ . (b) and (d) show the proportion of  $\eta_a^l$  to the total cathode polarization versus  $T$ . In the calculations, SOFCs operate at an output current density of 0.1 A/cm<sup>2</sup>. It is assumed that the leaked H<sub>2</sub> and O<sub>2</sub> react completely ( $x = 1$ ).

## References

1. B.C.H. Steele, A. Heinzel, Nature, 2001, 414(6861): 345-352.
